# Supplementary material
Source: PubMed Central journal article supplement (PMC2531069)
Supplement: NIHMS59486-supplement-CAN-08-1101R.pdf [file NIHMS59486-supplement-CAN-08-1101R.pdf]

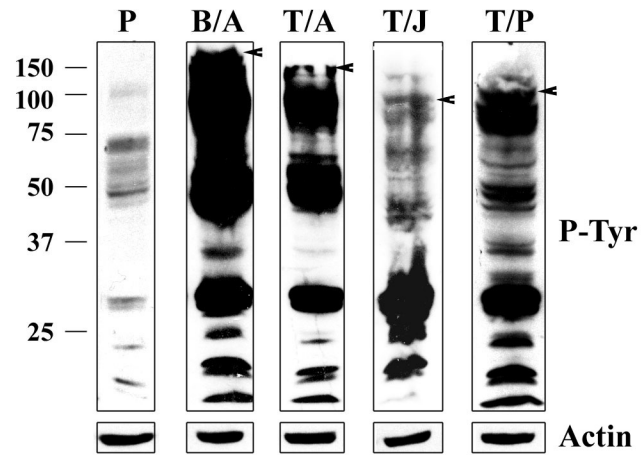

Supplementary Figure 1. Protein tyrosine phosphorylation in 32Dcl3 cells transfected with empty plasmid (P) and expression plasmids for BCR/ABL (B/A), TEL/ABL (T/A), TEL/JAKK2 (T/J) and TEL/PDGFB $\beta$ R (T/P) and cultured in the presence of IL-3 was detected in total cell lysates by Western analysis using anti-phosphotyrosine antibody (P-Tyr). Actin served as loading control.
